# Supplementary material
Source: Elsevier journal article supplement (https://www.sciencedirect.com/science/article/pii/S2173572722002144)

Figure 1 ESM. Study selection for this systematic review of the APP in COVID-19 subjects.

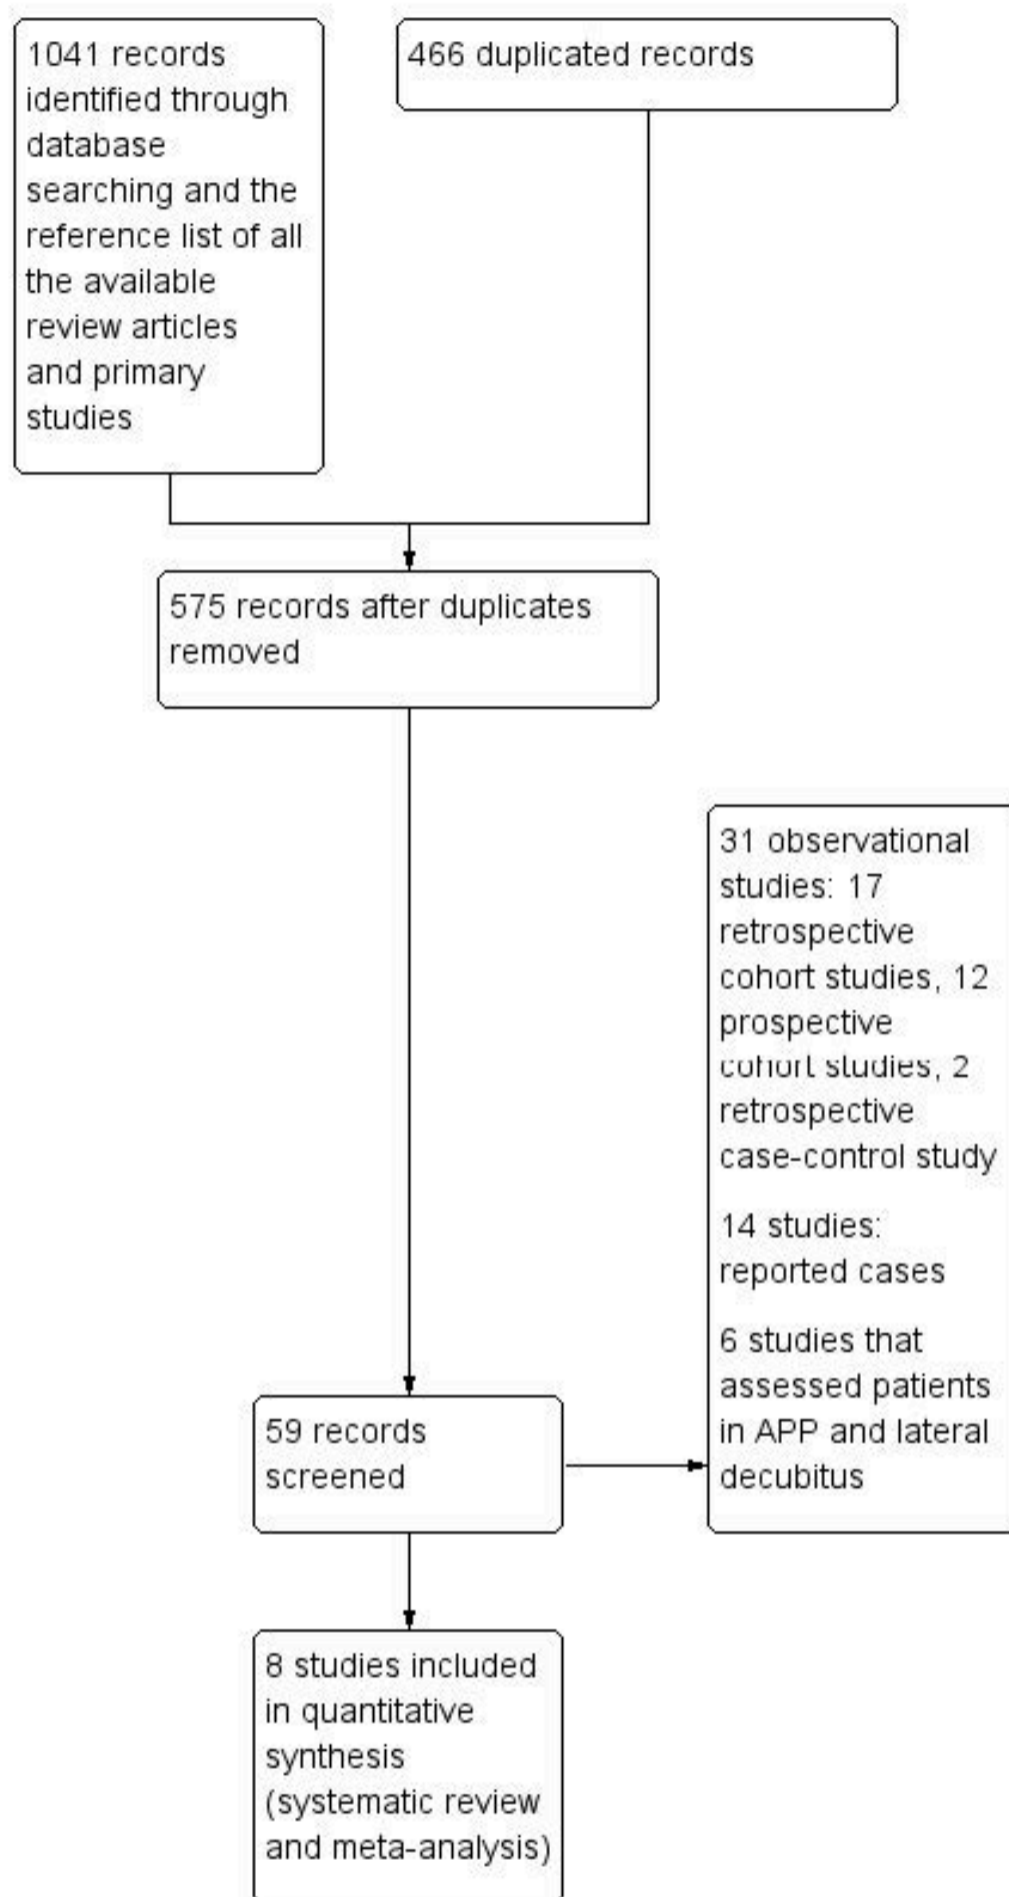

Figure 2 ESM. Sensitivity analysis: exclusion of study with large effect size.

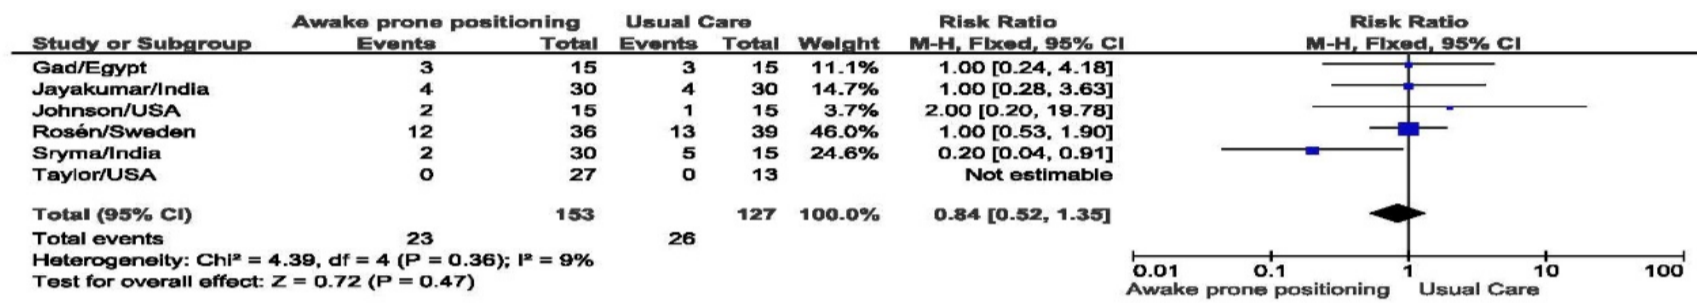

Supplement: mmc1 [file S2173572722002144:mmc1.pdf]
